# Supplementary material for: Novel Recovery of Nano-Structured Ceria (CeO2) from Ce(III)-Benzoxazine Dimer Complexes via Thermal Decomposition
Source: Int J Mol Sci. 2011 Jul 5;12(7):4365–77. doi: 10.3390/ijms12074365 (PMC3155356; doi:10.3390/ijms12074365)
Supplement: Supplementary file 1 [file ijms-12-04365-s001.pdf]

**Table 1S.** Equilibrium structure the Ce-MMD complex calculated by molecular dynamic simulation.

| Atoms | Coordinate |         |         |
|-------|------------|---------|---------|
|       | x axis     | y axis  | z axis  |
| Ce    | -0.359     | 0.0061  | 0.7286  |
| N     | -1.1528    | -2.4503 | 0.1764  |
| C     | -0.5459    | -3.5582 | 1.0907  |
| C     | -2.6299    | -2.4597 | 0.1954  |
| C     | -0.684     | -2.7832 | -1.1603 |
| C     | -0.6433    | -5.0697 | 0.736   |
| H     | 0.5138     | -3.3346 | 1.2087  |
| H     | -1.0413    | -3.53   | 2.0665  |
| H     | -3.1211    | -2.5383 | -0.5757 |
| H     | -2.9492    | -1.8619 | 1.089   |
| C     | -3.3731    | -3.8132 | 0.3081  |
| H     | -0.8939    | -2.0373 | -1.8157 |
| H     | 0.4503     | -2.9426 | -1.1921 |
| H     | -1.1122    | -3.6916 | -1.4924 |
| C     | -1.4961    | -5.9525 | 1.5081  |
| C     | 0.3442     | -5.6923 | -0.1461 |
| C     | -3.7407    | -4.5625 | -0.8374 |
| C     | -4.031     | -4.1808 | 1.4972  |
| C     | -1.4304    | -7.3383 | 1.3152  |
| H     | -2.024     | -5.5802 | 2.3499  |
| C     | 0.4212     | -7.078  | -0.2448 |
| O     | 1.2114     | -4.837  | -0.6453 |
| C     | -4.5718    | -5.7004 | -0.7742 |
| O     | -3.1683    | -4.1776 | -2.0463 |
| C     | -4.8543    | -5.3234 | 1.5938  |
| H     | -3.7788    | -3.6322 | 2.3242  |
| C     | -0.5631    | -7.914  | 0.3744  |
| C     | -2.5519    | -8.1192 | 1.9436  |
| H     | 1.2733     | -7.5466 | -0.7717 |
| H     | 1.737      | -4.9086 | -1.4908 |
| C     | -5.2303    | -5.9761 | 0.4301  |
| H     | -4.833     | -6.2762 | -1.6502 |
| H     | -3.3486    | -4.7397 | -2.748  |
| C     | -5.4187    | -5.6642 | 2.9412  |
| H     | -0.6583    | -8.9513 | 0.2369  |
| H     | -2.9793    | -7.641  | 2.8701  |
| H     | -3.3688    | -8.2222 | 1.2267  |

**Table 1S. Cont.**

|   |         |         |         |
|---|---------|---------|---------|
| H | -2.1539 | -9.1217 | 2.1872  |
| H | -6.0423 | -6.6687 | 0.4889  |
| H | -6.2432 | -5.0003 | 3.2347  |
| H | -5.7909 | -6.7337 | 2.9398  |
| H | -4.6938 | -5.5964 | 3.7582  |
| N | 0.0716  | 2.4063  | 1.6298  |
| C | 0.4551  | 3.3454  | 0.5041  |
| C | -1.1559 | 3.0455  | 2.3637  |
| C | 1.2415  | 2.577   | 2.5614  |
| C | 0.6564  | 4.8702  | 0.7742  |
| H | 1.3986  | 3.0773  | 0.0235  |
| H | -0.2793 | 3.3364  | -0.3015 |
| H | -1.6467 | 2.3234  | 3.0354  |
| H | -1.8776 | 3.3227  | 1.6301  |
| C | -1.0349 | 4.3551  | 3.2586  |
| H | 1.1699  | 3.5811  | 3.0225  |
| H | 1.3253  | 1.9225  | 3.4087  |
| H | 2.1677  | 2.5727  | 2.0286  |
| C | -0.3292 | 5.7256  | 0.2483  |
| C | 1.9098  | 5.3607  | 1.2101  |
| C | -0.5095 | 4.3899  | 4.5797  |
| C | -1.8751 | 5.3981  | 2.8704  |
| C | -0.106  | 7.1222  | 0.304   |
| H | -1.2268 | 5.3919  | -0.1143 |
| C | 2.117   | 6.729   | 1.2001  |
| O | 2.9126  | 4.5494  | 1.6645  |
| C | -0.637  | 5.5351  | 5.3552  |
| O | 0.1318  | 3.3042  | 5.0955  |
| C | -2.1012 | 6.5611  | 3.634   |
| H | -2.3298 | 5.3676  | 1.9421  |
| C | 1.0887  | 7.6275  | 0.8264  |
| C | -1.1618 | 8.1274  | -0.1201 |
| H | 3.0384  | 7.1316  | 1.5632  |
| H | 3.8113  | 4.7415  | 1.7877  |
| C | -1.4246 | 6.6499  | 4.8563  |
| H | -0.2005 | 5.6006  | 6.2539  |
| H | 0.3823  | 3.2476  | 6.002   |
| C | -3.0589 | 7.6105  | 3.1762  |
| H | 1.3347  | 8.7124  | 0.8714  |
| H | -1.3782 | 8.8061  | 0.7219  |

**Table 1S. Cont.**

|   |         |         |         |
|---|---------|---------|---------|
| H | -0.7852 | 8.6525  | -0.9656 |
| H | -2.0882 | 7.5956  | -0.4436 |
| H | -1.5107 | 7.4942  | 5.4868  |
| H | -3.6562 | 7.2012  | 2.3689  |
| H | -3.7907 | 7.7716  | 3.9112  |
| H | -2.594  | 8.5487  | 2.963   |
| N | -2.3252 | 0.7405  | -0.9149 |
| C | -2.4167 | -0.0661 | -2.181  |
| C | -3.5076 | 0.7129  | 0.0274  |
| C | -2.1912 | 2.1988  | -1.2983 |
| C | -3.3282 | 0.2553  | -3.3446 |
| H | -1.4006 | -0.2615 | -2.5669 |
| H | -2.6317 | -1.0984 | -1.8643 |
| H | -3.452  | 1.6136  | 0.6436  |
| H | -3.4234 | -0.1897 | 0.6504  |
| C | -4.9353 | 0.7221  | -0.5298 |
| H | -1.3557 | 2.3837  | -1.9945 |
| H | -3.077  | 2.4427  | -1.9186 |
| H | -2.1601 | 2.8747  | -0.4881 |
| C | -4.3638 | -0.6566 | -3.6994 |
| C | -3.0422 | 1.3191  | -4.2481 |
| C | -5.609  | 1.8823  | -1.0727 |
| C | -5.6868 | -0.4976 | -0.4392 |
| C | -5.2481 | -0.3159 | -4.7413 |
| H | -4.6967 | -1.4101 | -3.0293 |
| C | -3.8479 | 1.6216  | -5.3448 |
| O | -1.8942 | 2.1008  | -4.1066 |
| C | -6.8725 | 1.7498  | -1.671  |
| O | -5.069  | 3.1979  | -0.8552 |
| C | -7.0321 | -0.5868 | -0.8545 |
| H | -5.2064 | -1.2748 | 0.1092  |
| C | -4.9732 | 0.8302  | -5.52   |
| C | -6.382  | -1.172  | -5.1411 |
| H | -3.7154 | 2.3962  | -6.0027 |
| H | -1.7522 | 2.9327  | -4.5869 |
| C | -7.5423 | 0.5247  | -1.5435 |
| H | -7.3781 | 2.5151  | -2.2343 |
| H | -5.5045 | 4.0116  | -1.0983 |
| C | -7.683  | -1.9232 | -0.7663 |
| H | -5.5723 | 1.1012  | -6.3119 |

**Table 1S. Cont.**

|   |         |         |         |
|---|---------|---------|---------|
| H | -7.1844 | -0.6477 | -5.7858 |
| H | -6.0902 | -2.1164 | -5.7051 |
| H | -7.0125 | -1.5237 | -4.2941 |
| H | -8.5391 | 0.4029  | -1.9957 |
| H | -7.7588 | -2.4263 | -1.7891 |
| H | -7.0877 | -2.6081 | -0.1208 |
| H | -8.776  | -1.8204 | -0.4218 |
| N | 1.7092  | -1.0389 | 1.8674  |
| C | 1.3064  | -1.7326 | 3.0872  |
| C | 2.4552  | -1.988  | 0.9115  |
| C | 2.5826  | 0.0705  | 2.1996  |
| C | 2.0531  | -2.807  | 3.9013  |
| H | 1.1776  | -1.0813 | 3.8768  |
| H | 0.3829  | -2.2374 | 2.8623  |
| H | 2.8968  | -1.4065 | 0.1636  |
| H | 1.7657  | -2.6501 | 0.449   |
| C | 3.6251  | -2.8419 | 1.38    |
| H | 2.5119  | 0.8283  | 1.4213  |
| H | 2.2269  | 0.4343  | 3.155   |
| H | 3.6522  | -0.2287 | 2.32    |
| C | 1.4702  | -4.1083 | 4.0259  |
| C | 3.2817  | -2.5627 | 4.5609  |
| C | 4.9693  | -2.367  | 1.4035  |
| C | 3.4759  | -4.229  | 1.5249  |
| C | 2.1418  | -5.1696 | 4.7181  |
| H | 0.6197  | -4.3647 | 3.4826  |
| C | 3.8648  | -3.5831 | 5.363   |
| O | 3.8992  | -1.3773 | 4.6115  |
| C | 6.0832  | -3.1894 | 1.7991  |
| O | 5.273   | -1.223  | 0.8504  |
| C | 4.5527  | -5.0762 | 1.8999  |
| H | 2.5396  | -4.6387 | 1.4681  |
| C | 3.382   | -4.8692 | 5.3041  |
| C | 1.5579  | -6.5561 | 4.7348  |
| H | 4.7411  | -3.3371 | 5.7742  |
| H | 4.6097  | -1.1552 | 5.0855  |
| C | 5.8931  | -4.556  | 2.1028  |
| H | 7.0548  | -2.8234 | 1.9725  |
| H | 6.0934  | -0.8859 | 0.6928  |
| C | 4.3526  | -6.5273 | 2.1982  |

**Table 1S. Cont.**

|   |        |         |         |
|---|--------|---------|---------|
| H | 3.9704 | -5.5901 | 5.8463  |
| H | 0.6957 | -6.65   | 4.0799  |
| H | 2.3153 | -7.3239 | 4.3553  |
| H | 1.2849 | -6.6497 | 5.8407  |
| H | 6.7679 | -5.1508 | 2.3208  |
| H | 4.8503 | -7.1723 | 1.4908  |
| H | 4.8548 | -6.7984 | 3.1264  |
| H | 3.2933 | -6.8004 | 2.1482  |
| N | 1.412  | 0.4776  | -1.2353 |
| C | 1.4387 | -0.7427 | -2.0261 |
| C | 1.0548 | 1.5797  | -2.2035 |
| C | 2.7863 | 0.9041  | -0.8188 |
| C | 2.2858 | -0.9402 | -3.3108 |
| H | 1.7032 | -1.5802 | -1.369  |
| H | 0.418  | -0.974  | -2.3252 |
| H | 0.5195 | 2.3985  | -1.6795 |
| H | 0.3543 | 1.0344  | -2.8574 |
| C | 2.0147 | 2.282   | -3.1873 |
| H | 3.5629 | 1.1619  | -1.5794 |
| H | 2.7379 | 1.7881  | -0.2249 |
| H | 3.3038 | 0.1648  | -0.2002 |
| C | 1.5162 | -1.2432 | -4.4717 |
| C | 3.71   | -1.0718 | -3.3725 |
| C | 2.863  | 3.3726  | -2.8454 |
| C | 2.0977 | 1.8803  | -4.536  |
| C | 2.1797 | -1.6034 | -5.682  |
| H | 0.4351 | -1.0251 | -4.3909 |
| C | 4.3094 | -1.2623 | -4.6117 |
| O | 4.3541 | -1.187  | -2.1837 |
| C | 3.6949 | 4.016   | -3.8071 |
| O | 2.9698 | 3.8828  | -1.5649 |
| C | 2.8931 | 2.509   | -5.4839 |
| H | 1.4828 | 1.1155  | -4.9198 |
| C | 3.5671 | -1.5623 | -5.7437 |
| C | 1.4296 | -1.7187 | -6.9554 |
| H | 5.3409 | -1.4888 | -4.6902 |
| H | 5.3373 | -1.0367 | -2.1147 |
| C | 3.6766 | 3.625   | -5.1711 |
| H | 4.2711 | 4.7869  | -3.4966 |
| H | 3.5164 | 4.6176  | -1.2975 |

**Table 1S. Cont.**

|   |         |         |         |
|---|---------|---------|---------|
| C | 2.6176  | 2.0663  | -6.9147 |
| H | 4.0924  | -1.7505 | -6.6432 |
| H | 0.4021  | -1.986  | -6.7935 |
| H | 1.5602  | -0.7896 | -7.5798 |
| H | 1.8801  | -2.4968 | -7.5175 |
| H | 4.3904  | 3.9368  | -5.8874 |
| H | 3.3372  | 2.5501  | -7.6454 |
| H | 2.8419  | 1.007   | -6.9773 |
| H | 1.6353  | 2.3727  | -7.2015 |
| N | -1.6779 | -0.3218 | 3.0503  |
| C | -3.052  | 0.4496  | 2.9507  |
| C | -1.9609 | -1.7061 | 3.4903  |
| C | -0.879  | 0.3287  | 4.1129  |
| C | -3.6704 | 1.3513  | 4.0673  |
| H | -2.8389 | 1.0947  | 2.1481  |
| H | -3.8472 | -0.1734 | 2.5859  |
| H | -1.0293 | -2.1032 | 3.9438  |
| H | -2.2783 | -2.2352 | 2.6472  |
| C | -2.9225 | -2.1149 | 4.6296  |
| H | -0.0001 | 0.7712  | 3.6545  |
| H | -1.4094 | 1.1075  | 4.6911  |
| H | -0.4457 | -0.3731 | 4.7984  |
| C | -4.4154 | 2.3928  | 3.4949  |
| C | -3.7576 | 1.1264  | 5.4694  |
| C | -2.4493 | -2.6368 | 5.8459  |
| C | -4.2688 | -2.0657 | 4.4505  |
| C | -5.1989 | 3.26    | 4.3279  |
| H | -4.33   | 2.6311  | 2.418   |
| C | -4.4422 | 1.9839  | 6.3132  |
| O | -3.0686 | 0.149   | 6.0429  |
| C | -3.317  | -3.0847 | 6.8711  |
| O | -1.1353 | -2.8287 | 6.05    |
| C | -5.1815 | -2.5178 | 5.4247  |
| H | -4.6595 | -1.7119 | 3.5118  |
| C | -5.0255 | 3.139   | 5.716   |
| C | -5.8869 | 4.4872  | 3.8142  |
| H | -4.4266 | 1.846   | 7.3459  |
| H | -2.9848 | 0.1599  | 6.9512  |
| C | -4.6995 | -3.1213 | 6.6322  |
| H | -2.9176 | -3.623  | 7.7223  |

**Table 1S.** *Cont.*

|   |         |         |        |
|---|---------|---------|--------|
| H | -0.7743 | -3.1403 | 6.8745 |
| C | -6.6421 | -2.5217 | 5.2062 |
| H | -5.5241 | 3.8169  | 6.4443 |
| H | -6.3159 | 5.1175  | 4.5594 |
| H | -5.0614 | 5.0213  | 3.2538 |
| H | -6.6226 | 4.2523  | 3.0402 |
| H | -5.4177 | -3.4411 | 7.351  |
| H | -7.1447 | -2.2061 | 6.0992 |
| H | -6.7517 | -1.8871 | 4.3709 |
| H | -7.0898 | -3.4666 | 5.0625 |
